# Supplementary material for: Facile hydrothermal synthesis of TiO2–Bi2WO6hollow superstructures with excellent photocatalysis and recycle properties
Source: Royal Society of Chemistry journal article supplement (doi:10.1039/c3dt52046c), 2013-10-02
Supplement: c3dt52046c.pdf [file c3dt52046c.pdf]

### Electronic Supplementary Information

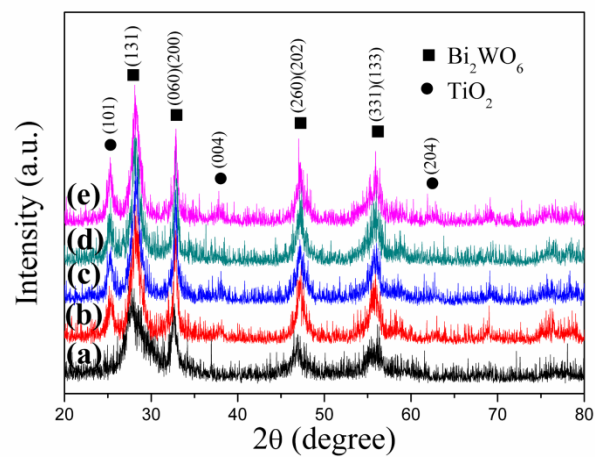

**Figure S1.** XRD patterns of  $\text{TiO}_2/\text{Bi}_2\text{WO}_6$  heterostructure obtained for different reaction time: (a) 1h, (b) 7h, (c) 14h, (d) 21h, (e) 28h.

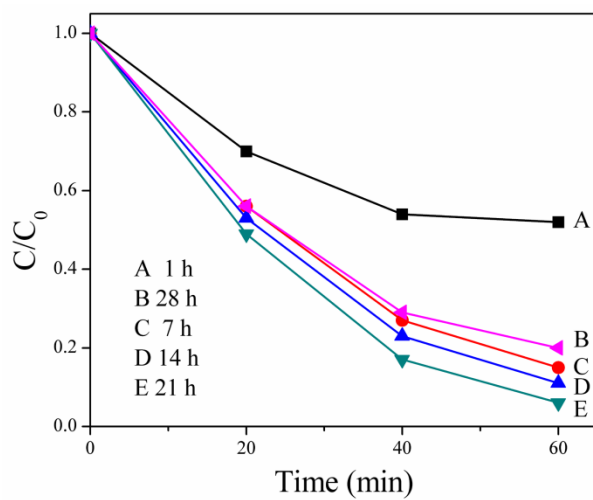

**Figure S2.** Degradation of RhB in presence of samples obtained for different reaction time: (A) 1h, (B) 28h, (C) 7h, (D) 14h, (E) 21h.
